# Supplementary material for: TPD-based polythiophene derivatives with higher Vocfor polymer solar cells
Source: Royal Society of Chemistry journal article supplement (doi:10.1039/c6ra10481a), 2016-01-01
Supplement: c6ra10481a1.pdf [file c6ra10481a1.pdf]

## Supporting Information

### TPD-Based Polythiophene Derivatives with Higher $V_{oc}$ for Polymer Solar Cells

Kun Wang<sup>a,b</sup>, Zhuo Xu<sup>a</sup>, Bing Guo<sup>a</sup>, Xia Guo<sup>a,\*</sup>, Maojie Zhang<sup>a,\*</sup>, Yongfang Li<sup>a,c\*</sup>

<sup>a</sup> *Laboratory of Advanced Optoelectronic Materials, College of Chemistry, Chemical Engineering and Materials Science, Soochow University, Suzhou 215123, China*

E-mail: [mjzhang@suda.edu.cn](mailto:mjzhang@suda.edu.cn); [guoxia@suda.edu.cn](mailto:guoxia@suda.edu.cn).

<sup>b</sup> *College of Materials and Chemical Engineering, Zhongyuan University of Technology, Zhengzhou 451191, China*

<sup>c</sup> *Beijing National Laboratory for Molecular Sciences, CAS Key Laboratory of Organic Solids, Institute of Chemistry, Chinese Academy of Sciences, Beijing 100190, China*

E-mail: [liyf@iccas.ac.cn](mailto:liyf@iccas.ac.cn)

### Experimental Section

#### I. Measurements

<sup>1</sup>H NMR and <sup>13</sup>C NMR spectra of the monomers and the polymers were measured on a Bruker ARX-400 spectrometer. UV-vis absorption spectra were taken on an Agilent Technologies Cary Series UV-Vis-NIR Spectrophotometer. The electrochemical cyclic voltammetry (CV) was conducted on a Zahner Ennium Electrochemical Workstation with glassy carbon disk, Pt wire, and Ag/Ag<sup>+</sup> electrode as working electrode, counter electrode, and reference electrode respectively in a 0.1 mol L<sup>-1</sup> tetrabutylammonium

hexafluorophosphate ( $\text{Bu}_4\text{NPF}_6$ ) acetonitrile solution at a scan rate of  $50 \text{ mV s}^{-1}$ . The thermo-gravimetric analysis (TGA) was carried out on a TA Instruments, Inc., discovery instrument under purified nitrogen gas flow with a  $10 \text{ }^\circ\text{C min}^{-1}$  heating rate. Differential scanning calorimeter (DSC) was carried out on a TA Instruments, Inc., Q200 instrument under purified nitrogen gas flow with a  $5 \text{ }^\circ\text{C min}^{-1}$  heating rate. GPC measurement was performed on Agilent Technologies, PL-GPC 220 High Temperature Chromatograph using 1,2,4-trichlorobenzene as the eluent at  $160 \text{ }^\circ\text{C}$ . X-ray diffraction (XRD) of the polymers were carried out on a X'Pert-Pro MRD diffractometer from PANalytical B.V. Transmission electron microscopy (TEM) was performed using a Tecnai G2 F20 S-Twin instrument at 200 kV accelerating voltage. Atomic force microscope (AFM) was performed using a Veeco Dimension 3100 instrument.

## **II. Device fabrication and characterization**

Polymer solar cells (PSCs) were fabricated by routine methods, the details of the device fabrication and characterization were described in the following:

PSCs with the structure of ITO/PEDOT: PSS/polymer:  $\text{PC}_{71}\text{BM}$ /buffer layer/Al were fabricated under the conditions as follows: patterned indium tin oxide (ITO)-coated glass with a sheet resistance of 10-15 ohm/square was cleaned by a surfactant scrub and then underwent a wet-cleaning process inside an ultrasonic bath, beginning with deionized water followed by acetone and isopropanol. After oxygen plasma cleaning for 10 min, a 30 nm thick poly(3, 4-ethylenedioxythiophene): poly(styrenesulfonate) (PEDOT:PSS) (Bayer Baytron 4083) anode buffer layer was

spin-cast onto the ITO substrate and then dried by baking in an oven at 150 °C for 15 min. The active layer was then deposited on top of the PEDOT: PSS layer by spin-coating a 10 mg ml<sup>-1</sup> *o*-dichlorobenzene blend solution of polymer and PC<sub>71</sub>BM. The thickness of the active layer was controlled by changing the spin speed during the spin-coating process and measured on an Ambios Tech. XP-2 profilometer. Finally, 20 nm Ca and 80 nm Al layer were successively deposited in vacuum onto the active layer at a pressure of ca.  $4 \times 10^{-4}$  Pa. The overlapping area between the cathode and anode defined a pixel size of 4 mm<sup>2</sup>. Except for the deposition of the PEDOT: PSS layers, all the fabrication processes were carried out inside a dry box containing less than 5 ppm oxygen and moisture.

The current density-voltage ( $J$ - $V$ ) curves of the PSCs were measured with a Keithley 236 Source Measure unit, under the illumination of AM 1.5G, 100 mW cm<sup>-2</sup> using a xenon-lamp- based solar simulator (SAN-EI ELECTRIC CO., LTD.). The external quantum efficiency (EQE) was measured by Solar Cell Spectral Response Measurement System QE-R3011 (Enli Technology CO., Ltd.). The light intensity at each wavelength was calibrated with a standard single-crystal Si photovoltaic cell.

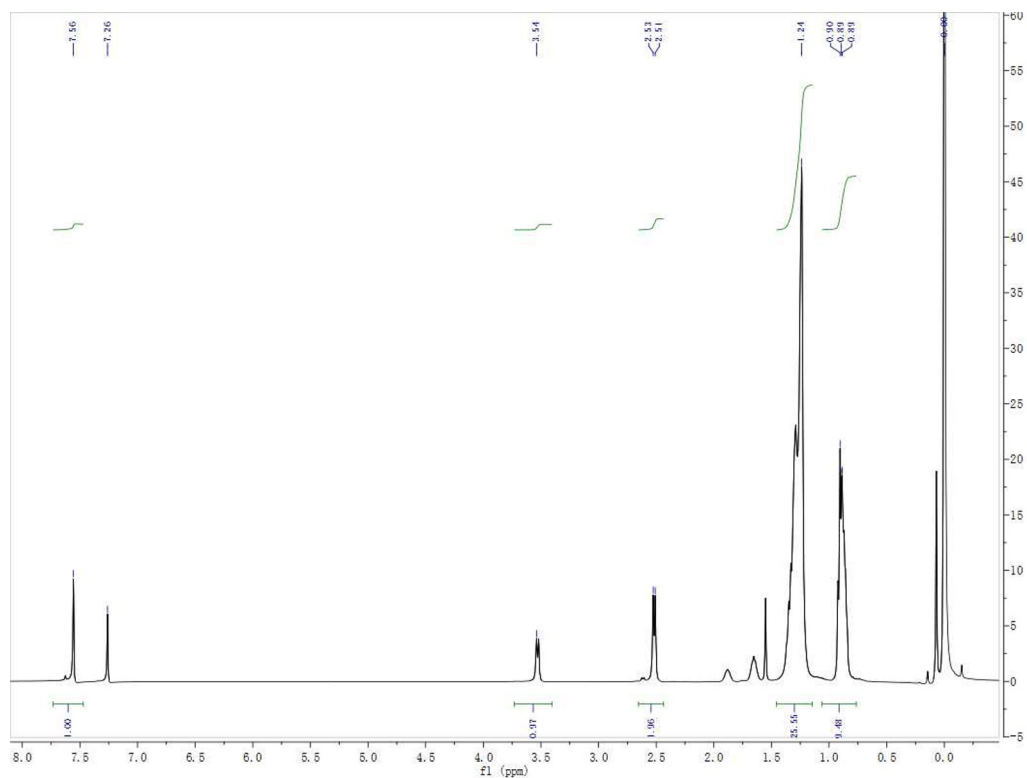

**Fig. S1.** <sup>1</sup>H NMR spectrum of monomer TPD

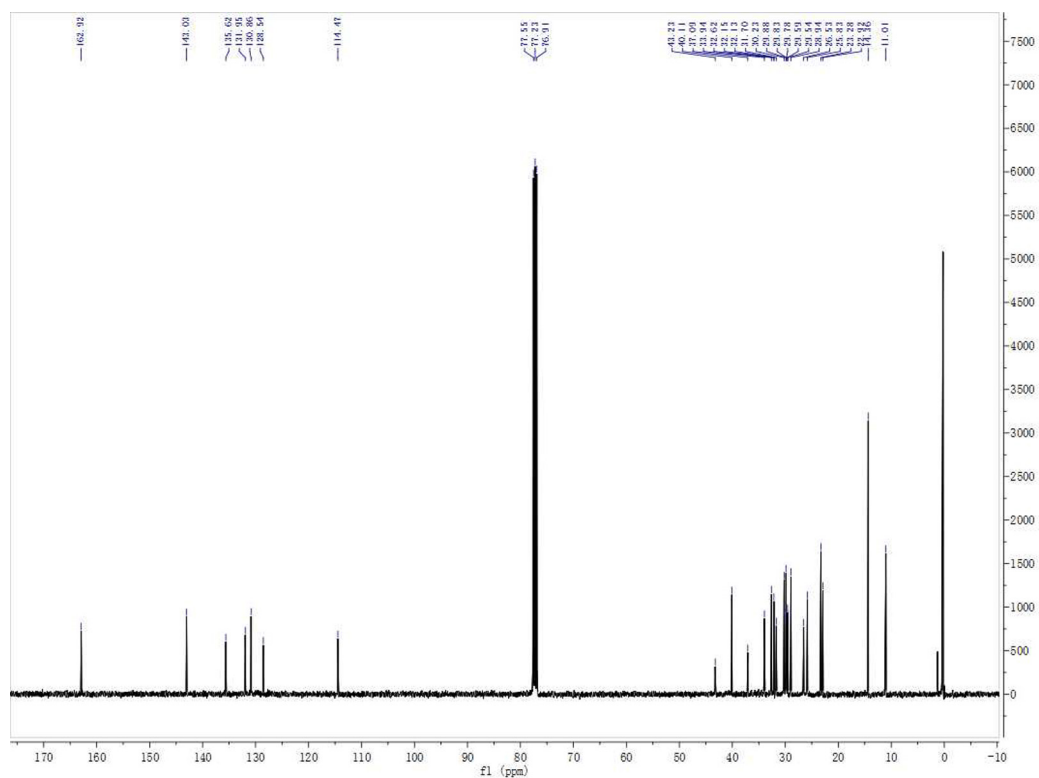

**Fig. S2.** <sup>13</sup>C NMR spectrum of monomer TPD

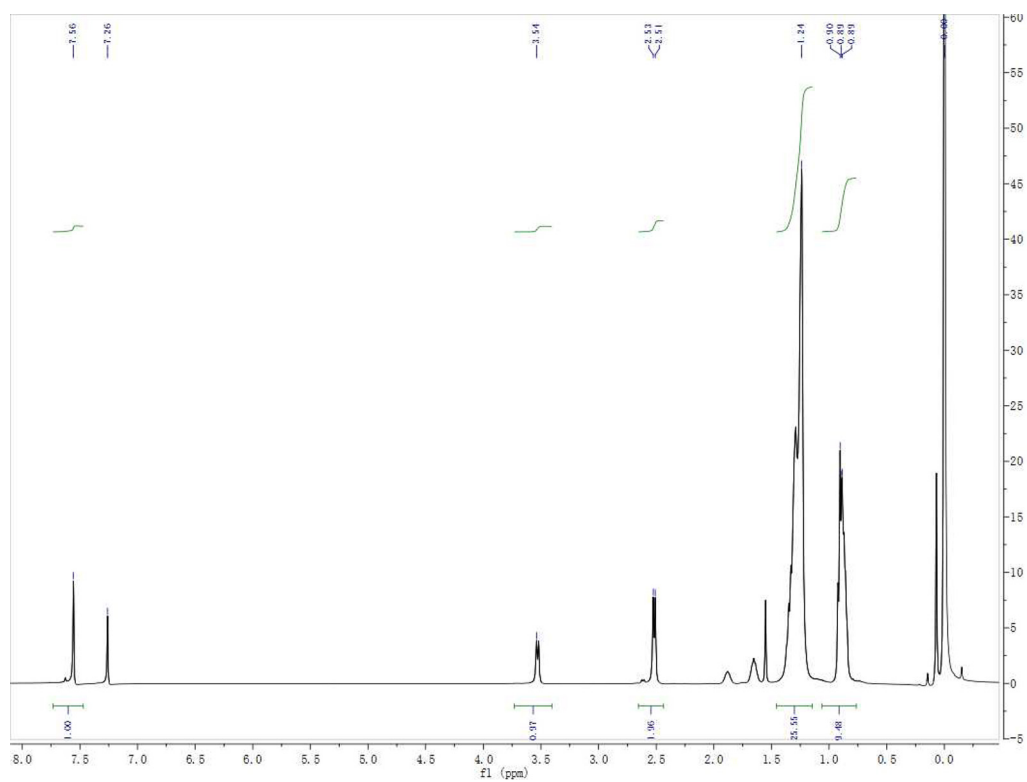

**Fig. S3.** <sup>1</sup>H NMR spectrum of monomer **DT**

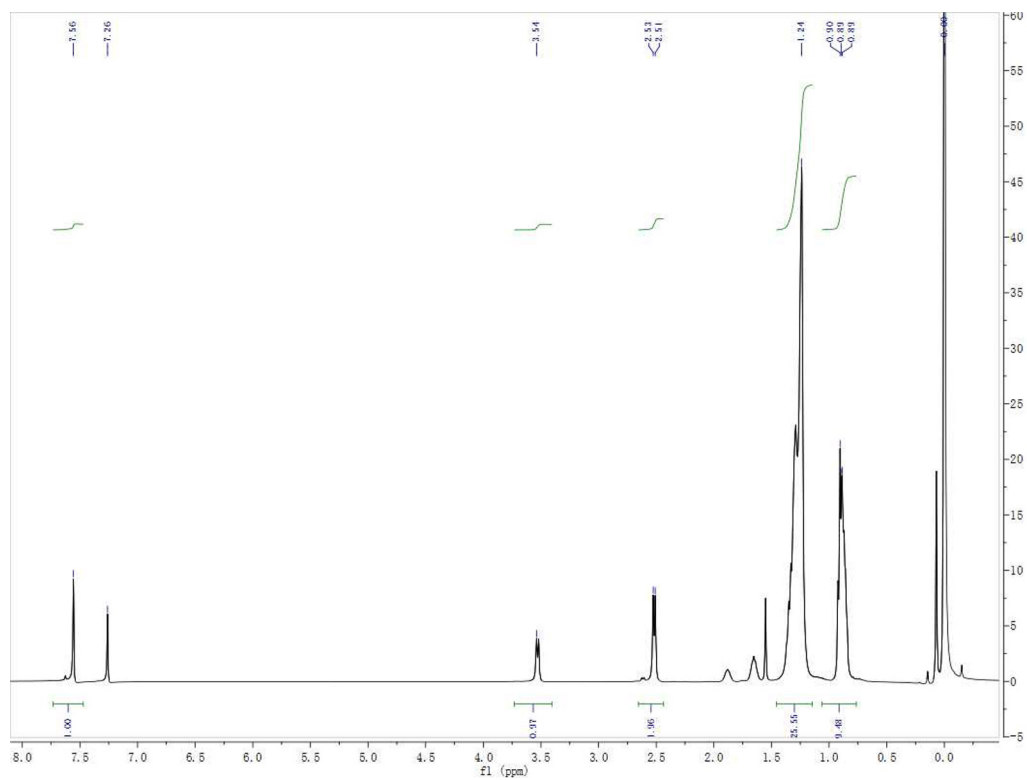

**Fig. S4.** <sup>1</sup>H NMR spectrum of monomer **DFDT**

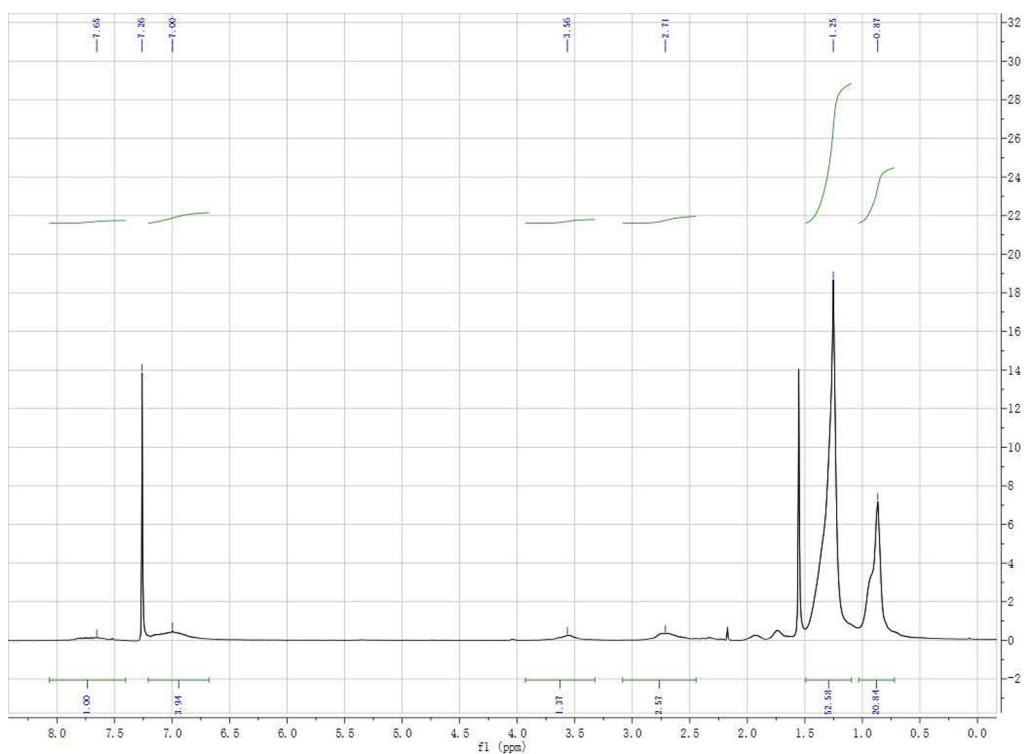

**Fig. S5.**  $^1\text{H}$  NMR spectrum of **PTPD-DT**

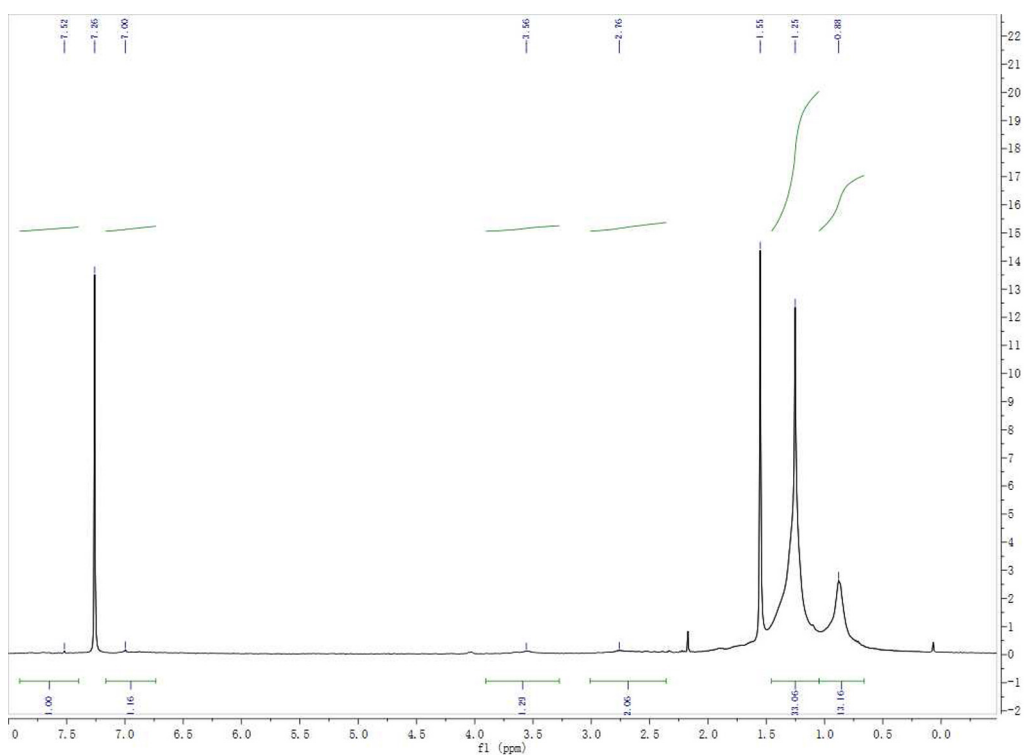

**Fig. S6.**  $^1\text{H}$  NMR spectrum of **PTPD-DFDT**

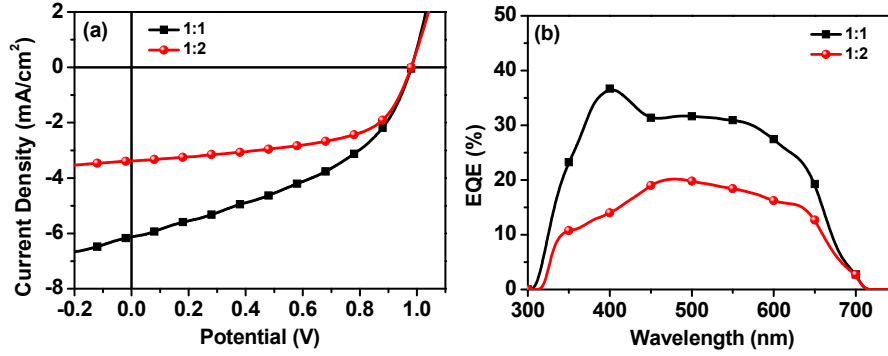

**Fig. S7** (a)  $J$ - $V$  characteristics, (b) EQE curves of devices based on **PTPD-DFDT**:  
PC<sub>71</sub>BM blend film with D/A weight ratios of 1:1 and 1:2.

**Table S1.** Photovoltaic performance parameters of the PSCs based on **PTPD-DFDT** as donor and PC<sub>71</sub>BM as acceptor with D/A weight ratios of 1:1 and 1:2 under illumination of AM 1.5 G, 100 mW cm<sup>-2</sup>.

| D/A ratio | $V_{oc}$ (V) | $J_{sc}$ (mA cm <sup>-2</sup> ) | $J_{sc}$ (mA cm <sup>-2</sup> ) <sup>a</sup> | FF (%) | PCE (%) |
|-----------|--------------|---------------------------------|----------------------------------------------|--------|---------|
| 1:1       | 0.98         | 6.12                            | 5.68                                         | 42.6   | 2.56    |
| 1:2       | 0.98         | 3.38                            | 3.24                                         | 57.2   | 1.90    |

<sup>a</sup> Integrated from EQE,

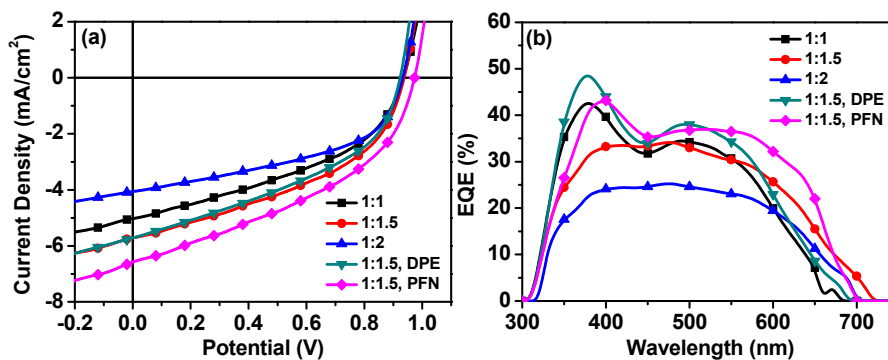

**Fig. S8** (a)  $J$ - $V$  characteristics, (b) EQE curves of devices based on **PTPD-DT**:  
PC<sub>71</sub>BM blend film with different conditions.

**Table S2.** Photovoltaic performance parameters of the PSCs based on **PTPD-DT** as donor and PC<sub>71</sub>BM as acceptor with different conditions under illumination of AM 1.5 G, 100 mW cm<sup>-2</sup>.

| <b>D/A ratio</b>         | <b><math>V_{oc}</math> (V)</b> | <b><math>J_{sc}</math> (mA cm<sup>-2</sup>)</b> | <b><math>J_{sc}</math> (mA cm<sup>-2</sup>)<sup>a</sup></b> | <b>FF (%)</b> | <b>PCE (%)</b> |
|--------------------------|--------------------------------|-------------------------------------------------|-------------------------------------------------------------|---------------|----------------|
| <b>1:1</b>               | 0.94                           | 5.02                                            | 4.71                                                        | 42.0          | 1.97           |
| <b>1:1.5</b>             | 0.94                           | 5.72                                            | 5.25                                                        | 43.3          | 2.32           |
| <b>1:2</b>               | 0.93                           | 4.06                                            | 3.86                                                        | 47.4          | 1.79           |
| <b>1:1.5<sup>b</sup></b> | 0.92                           | 5.72                                            | 5.32                                                        | 41.3          | 2.18           |
| <b>1:5<sup>c</sup></b>   | 0.93                           | 6.15                                            | 6.12                                                        | 43.3          | 2.48           |

<sup>a</sup> Integrated from EQE, <sup>b</sup> with 3% DPE as solvent additive, <sup>c</sup> with PFN as buffer layer.

**Table S3.** Photovoltaic performance parameters of the PSCs based on **PTPD-DT** as donor and PC<sub>71</sub>BM as acceptor with different additives (w/w, 1:1.5) under illumination of AM 1.5 G, 100 mW cm<sup>-2</sup>.

| <b>Additive (3%)</b> | <b><math>V_{oc}</math> (V)</b> | <b><math>J_{sc}</math> (mA cm<sup>-2</sup>)</b> | <b>FF (%)</b> | <b>PCE (%)</b> |
|----------------------|--------------------------------|-------------------------------------------------|---------------|----------------|
| <b>without</b>       | 0.94                           | 5.72                                            | 43.3          | 2.32           |
| <b>DIO</b>           | 0.92                           | 3.20                                            | 46.5          | 1.36           |
| <b>CN</b>            | 0.93                           | 5.30                                            | 41.8          | 2.05           |
| <b>NMP</b>           | 0.91                           | 4.05                                            | 41.3          | 1.52           |
| <b>DPE</b>           | 0.92                           | 5.72                                            | 41.3          | 2.18           |



**Table S4.** Photovoltaic performance parameters of the PSCs based on **PTPD-DFDT** as donor and PC<sub>71</sub>BM as acceptor with different additives (w/w, 1:1.5) under illumination of AM 1.5 G, 100 mW cm<sup>-2</sup>.

| <b>Additive (3%)</b> | <b><math>V_{oc}</math> (V)</b> | <b><math>J_{sc}</math> (mA cm<sup>-2</sup>)</b> | <b>FF (%)</b> | <b>PCE (%)</b> |
|----------------------|--------------------------------|-------------------------------------------------|---------------|----------------|
| <b>without</b>       | 0.98                           | 6.03                                            | 47.4          | 2.80           |
| <b>DIO</b>           | 0.97                           | 7.54                                            | 47.6          | 3.47           |
| <b>CN</b>            | 0.96                           | 8.11                                            | 50.5          | 3.94           |
| <b>NMP</b>           | 0.93                           | 9.54                                            | 47.3          | 4.20           |
| <b>DPE</b>           | 0.96                           | 10.25                                           | 54.0          | 5.31           |

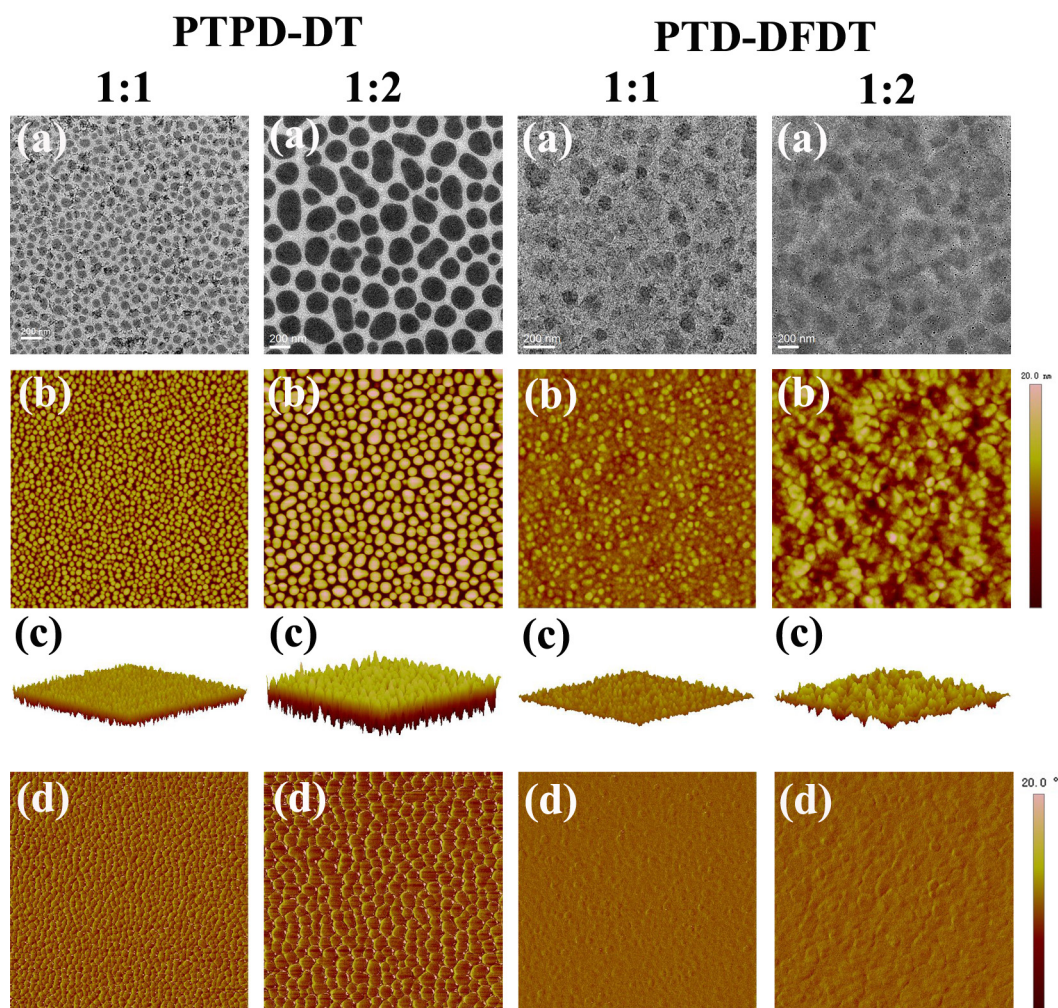

**Fig. S9.** TEM images and Tapping-mode AFM images of **PTPD-DT or PTPD-DFDT**: PC<sub>71</sub>BM blend films. TEM images (a), AFM (all 5 × 5 μm) height images (b), three-dimensional height images (c) and topography images (d) of the blend films with D/A ratio of 1:1 and 1:2. The  $R_q$  of the blend films are 3.35 nm for **PTPD-DT** with D/A of 1:1; 7.30 nm for **PTPD-DT** with D/A of 1:2; 1.49 nm for **PTPD-DFDT** with D/A of 1:1 and 2.99 nm for **PTPD-DFDT** with D/A of 1:2, respectively.

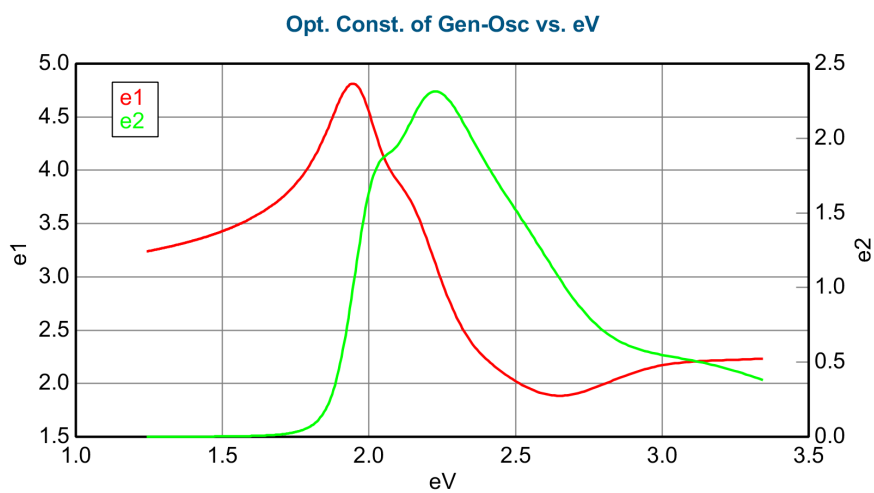

**Fig. S10.** Dielectric constant of PTPD-DT

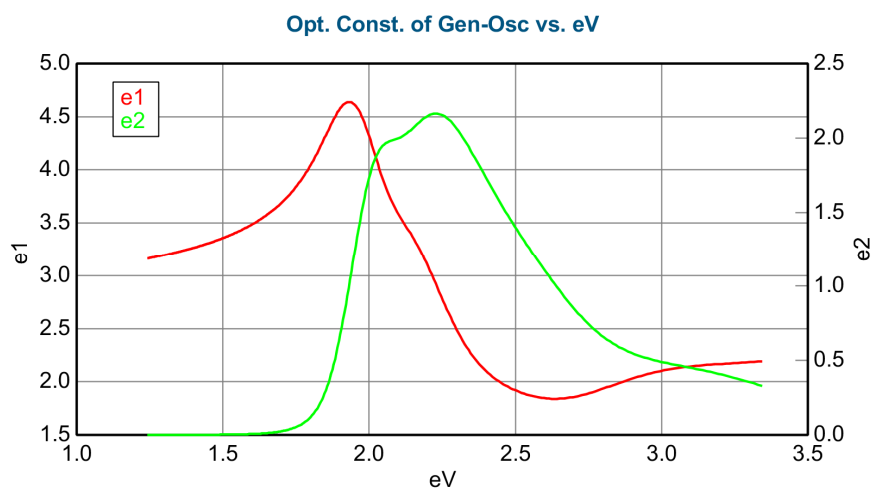

**Fig. S11.** Dielectric constant of PTPD-DFDT
